# Supplementary material for: CD32+CD4+ T Cells Sharing B Cell Properties Increase With Simian Immunodeficiency Virus Replication in Lymphoid Tissues
Source: Front Immunol. 2021 Jun 16;12:695148. doi: 10.3389/fimmu.2021.695148 (PMC8242952; doi:10.3389/fimmu.2021.695148)
Supplement: Supplementary Table 3 — Pathway up- and down-regulated in CD32+CD4+ T cells when compared to CD32-CD4+T cells in chronically infected MAC. [file Table_3.xlsx]

## Sheet: MAC
Up regulated
GOID	Ontology Source	GOTerm	GOLevels	GOGroups	Nr. Genes	% Associated Genes	Term PValue	Term PValue Corrected with Bonferroni step down	Group PValue	Group PValue Corrected with Bonferroni step down	Associated Genes Found	All Associated Genes	OverViewTerm
GO:0003332	GO_BiologicalProcess-EBI-UniProt-GOA_27.02.2019_00h00	negative regulation of extracellular matrix constituent secretion	[4, 5, 6, 7, 8]	[Group00]	3	75.0	2.7305248732251105E-5	0.0033039350966023837	{Group00=2.7305248732251105E-5}	{Group00=2.7305248732251105E-5}	[ADTRP, NOTCH1, TNFRSF1B]	[ADTRP, NOTCH1, TNFRSF1A, TNFRSF1B]	TRUE
GO:0014015	GO_BiologicalProcess-EBI-UniProt-GOA_27.02.2019_00h00	positive regulation of gliogenesis	[5, 6, 7, 8, 9, 10]	[Group01]	10	11.235955	7.651439997154937E-6	9.71732879638677E-4	{Group01=7.651439997154937E-6}	{Group01=3.060575998861975E-5}	[ASPM, IL6ST, LIF, MYB, NOTCH1, PPP1CC, PRKCH, SERPINE2, TIAM1, TSPO]	[A1CF, AGER, APP, ASIP, ASPA, ASPM, ATG5, ATP6V0A4, BIN1, BMP2, C1D, C1QA, C3, CCL3, CCR2, CDH4, CLC, CLCF1, CRKL, CSF1, CXCR4, DAG1, DICER1, E2F1, ETV5, GATD3A, GFAP, GJC2, GSX2, HDAC1, HDAC2, HES1, HMGCL, ID2, IGKV1D-27, IL1B, IL6, IL6ST, LGALS7B, LIF, LIPC, LRP1, LRP2, LTA, LYN, MAG, MOK, MTOR, MYB, NKX2-2, NKX6-1, NKX6-2, NOTCH1, OLIG2, P2RX4, P2RY12, PLAG1, PLP2, PMAIP1, PPARG, PPP1CC, PRKCH…	TRUE
GO:0030217	GO_BiologicalProcess-EBI-UniProt-GOA_27.02.2019_00h00	T cell differentiation	[5, 6, 7, 8, 9, 10]	[Group08]	29	9.698997	7.708363932078788E-13	1.1947964094722123E-10	{Group08=1.2166295254792427E-20}	{Group08=1.2166295254792427E-19}	[ASPM, BATF, BCL11B, BCL2, BRCA2, CAMK4, CD28, CD3D, CD3E, CD4, CTLA4, GATA3, IL15, IL7R, ITK, ITPKB, JAK3, LEF1, MYB, NFATC2, RPS6KB2, STAT5B, TCF7, TCIRG1, TESPA1, THEMIS, TNFRSF18, ZC3H12A, ZFPM1]	[A1CF, ABL1, ACKR2, ADA, ADAM17, ADAM8, AIRE, ANXA1, AP3B1, AP3D1, ARHGEF28, ASIP, ASPA, ASPM, ATG5, ATP7A, AZF1, B2M, BAD, BATF, BCL11B, BCL2, BCL3, BCL5, BCL6, BLM, BMP4, BRAF, BRCA2, BRF1, BRF2, BTN2A2, C3, CAMK2G, CAMK4, CAPG, CARD11, CAVIN3, CBFB, CCL19, CCR2, CCR6, CCR7, CCR9, CD1D, CD2, CD27, CD28, CD3D, CD3E, CD3G, CD4, CD46, CD74, CD80, CD83, CD86, CD8A, CDH11, CDK2, CDK6, CDKN2A, CHD7, …	TRUE
GO:0031295	GO_BiologicalProcess-EBI-UniProt-GOA_27.02.2019_00h00	T cell costimulation	[3, 6, 7, 8, 9]	[Group05, Group07, Group09]	12	15.384615	2.7732202003898824E-8	4.048901492569228E-6	{Group05=2.9488669360520283E-15, Group07=1.3094989543445803E-15, Group09=4.5548192676488985E-18}	{Group05=2.06420685523642E-14, Group07=1.0475991634756642E-14, Group09=4.099337340884009E-17}	[CD28, CD3E, CD40LG, CD5, CTLA4, EPHB6, GRAP2, ICOS, NCOA1, PDCD1, PTPN11, TRAF2]	[ACP5, AKT1, AMBP, ARHGEF7, BTLA, CA5A, CARD11, CAV1, CAV2, CCL19, CCL21, CCR7, CD160, CD24, CD274, CD28, CD3E, CD40LG, CD5, CD80, CD81, CD86, CDC42, CPOX, CROT, CSK, CTLA4, DLEU1, DPP4, EFNB1, EFNB2, EFNB3, EPHB6, FYN, GRAP2, GRB2, HHLA2, ICOS, ICOSLG, KLRK1, LCK, LGALS1, LOC102723996, LYN, MAP3K8, MECOM, NCOA1, PAK1, PAK2, PAK3, PDCD1, PDCD1LG2, PDK1, PDPK1, PIK3CA, PIK3R1, PKN1, PKN2, PTK2B, P…	FALSE
GO:0033077	GO_BiologicalProcess-EBI-UniProt-GOA_27.02.2019_00h00	T cell differentiation in thymus	[6, 7, 8, 9, 10, 11]	[Group08]	13	13.541667	3.542709745703998E-8	5.136929131270797E-6	{Group08=1.2166295254792427E-20}	{Group08=1.2166295254792427E-19}	[ASPM, BCL11B, BCL2, CAMK4, CD28, CD3D, CD3E, GATA3, IL7R, ITPKB, RPS6KB2, STAT5B, TESPA1]	[A1CF, ADA, ADAM17, ADAM8, AIRE, ASIP, ASPA, ASPM, ATG5, B2M, BCL11B, BCL2, BMP4, BRF1, BRF2, C3, CAMK2G, CAMK4, CARD11, CCR6, CCR7, CD28, CD3D, CD3E, CD3G, CD74, CDK2, CDK6, CDKN2A, CLPTM1, CMM, CTNNB1, DNAJA3, DOCK2, EGR3, ERBB2, ETF1, FADD, FOXJ1, FOXN1, FOXP3, FZD5, FZD7, FZD8, GATA3, GLI2, GLI3, IHH, IL7R, INTS1, ITPKB, JAG2, JMJD6, LIG4, MAFB, MECOM, MPRIP, MS2, NCAPH2, NEU1, NFKBID, NKAP, …	FALSE
GO:0035591	GO_BiologicalProcess-EBI-UniProt-GOA_27.02.2019_00h00	signaling adaptor activity	[4, 5, 6, 7]	[Group03]	11	9.016394	2.259070699724214E-5	0.0027786569606607836	{Group03=2.259070699724214E-5}	{Group03=4.518141399448428E-5}	[CD28, CHN2, DOK2, GRAP2, LAT, NCOA1, PTPN11, SH2D1A, SH2D2A, SKAP1, SLA]	[ABI2, ACTRT1, AFAP1L2, AKAP13, APCS, ARHGAP1, ARHGAP4, ARHGAP6, ARL6IP1, AXIN1, BIRC3, BLNK, CD28, CHAF1B, CHIC1, CHN1, CHN2, CLNK, CNTNAP1, CNTNAP2, COL26A1, CREBBP, CRK, CRKL, DAB2IP, DOK2, DUSP19, EGR2, EIF4E, EPS8, FCRL2, FCRLB, FRS2, GAB1, GAB2, GFER, GJA1, GRAP, GRAP2, GRB10, GRB14, GRB2, GRB7, HOMER1, HSD17B7, IRS1, IRS4, ITSN2, KHDRBS1, KLK3, KSR1, LASP1, LAT, LDLRAP1, MAGI2, MAPK8IP1, M…	TRUE
GO:0042102	GO_BiologicalProcess-EBI-UniProt-GOA_27.02.2019_00h00	positive regulation of T cell proliferation	[6, 7, 8, 9]	[Group04, Group07]	16	12.307693	3.841687905613971E-9	5.724114979364816E-7	{Group04=3.922203759295895E-10, Group07=1.3094989543445803E-15}	{Group04=2.3533222555775368E-9, Group07=1.0475991634756642E-14}	[CCDC88B, CD28, CD3E, CD4, CD40LG, CD6, IL15, IL21, IL6R, IL6ST, JAK3, PRKCQ, RPS6KB2, STAT5B, TFRC, TRAF2]	[ACP5, AGER, AIF1, ANXA1, ARHGEF28, BLM, BP2, BTNL2, CALB2, CAPG, CARD11, CCDC88B, CCL19, CCL5, CCR2, CD1D, CD209, CD24, CD274, CD276, CD28, CD3E, CD4, CD40LG, CD46, CD55, CD6, CD80, CD81, CD86, CDH11, CLECL1, CORO1A, CR2, CTF2P, DHRS4, DNAJA3, EBI3, EFNB1, EPO, EPX, FADD, FOXP3, GATD3A, GPAM, HAVCR2, HES1, HHLA2, HLA-A, HLA-DMB, HLA-DPA1, HLA-DPB1, HLA-DRB3, HLA-E, HMGB1, HMGCL, ICOSLG, IGBP1, I…	TRUE
GO:0042129	GO_BiologicalProcess-EBI-UniProt-GOA_27.02.2019_00h00	regulation of T cell proliferation	[6, 7, 8]	[Group07]	19	8.636364	4.989971218955648E-8	7.185558555296134E-6	{Group07=1.3094989543445803E-15}	{Group07=1.0475991634756642E-14}	[CCDC88B, CD28, CD3E, CD4, CD40LG, CD6, CTLA4, IL15, IL21, IL6R, IL6ST, JAK3, PLCL1, PRKCQ, RPS6KB2, STAT5B, TFRC, TNFRSF1B, TRAF2]	[ABCB6, ACP5, AGER, AIF1, AMBP, ANXA1, ARG1, ARG2, ARHGEF28, BLM, BMP4, BP2, BTN2A2, BTNL2, C4BPA, CALB2, CAPG, CARD11, CARD14, CASP3, CCDC88B, CCL19, CCL5, CCR2, CD1D, CD209, CD24, CD274, CD276, CD28, CD3E, CD4, CD40LG, CD46, CD55, CD6, CD80, CD81, CD86, CDH11, CDK2, CDKN2A, CEBPB, CLC, CLCF1, CLEC4G, CLECL1, CMM, CORO1A, CPOX, CR2, CTF2P, CTLA4, CTNNB1, DEAF1, DHRS4, DLG1, DLG5, DNAJA3, EBI3, E…	FALSE
GO:0043368	GO_BiologicalProcess-EBI-UniProt-GOA_27.02.2019_00h00	positive T cell selection	[3, 7, 8, 9, 10, 11, 12]	[Group08]	9	21.95122	6.296835837966833E-8	9.004475248292572E-6	{Group08=1.2166295254792427E-20}	{Group08=1.2166295254792427E-19}	[BATF, BCL11B, BCL2, CD3D, CD3E, ITPKB, RPS6KB2, THEMIS, ZFPM1]	[BATF, BCL11B, BCL2, BRAF, CD3D, CD3E, CD3G, CD74, CYLD, DEAF1, DOCK2, FOXN1, FOXP3, IL12B, IL12RB1, IL23A, IL23R, IL6, IRF4, ITPKB, LOXL1, LOXL3, LY9, MTOR, PTPN2, PTPRC, PWWP3A, RIT1, RPS6KB2, SHH, SLAMF6, SPN, SRF, STAT3, STAT6, STK11, TARP, TBX21, THEMIS, ZAP70, ZFPM1]	FALSE
GO:0043383	GO_BiologicalProcess-EBI-UniProt-GOA_27.02.2019_00h00	negative T cell selection	[3, 7, 8, 9, 10, 11, 12]	[Group08]	5	25.0	3.036560023161453E-5	0.0036438720277937437	{Group08=1.2166295254792427E-20}	{Group08=1.2166295254792427E-19}	[ASPM, CD28, CD3E, RPS6KB2, THEMIS]	[A1CF, AIRE, ASIP, ASPA, ASPM, ATG5, C3, CCR7, CD28, CD3E, CD74, DOCK2, GLI3, MECOM, PTPRC, ROPN1L, RPS6KB2, SHH, THEMIS, ZAP70]	FALSE
GO:0045058	GO_BiologicalProcess-EBI-UniProt-GOA_27.02.2019_00h00	T cell selection	[2, 6, 7, 8, 9, 10, 11]	[Group08]	14	22.950819	6.760109088495046E-12	1.034296690539742E-9	{Group08=1.2166295254792427E-20}	{Group08=1.2166295254792427E-19}	[ASPM, BATF, BCL11B, BCL2, CD28, CD3D, CD3E, CD4, GATA3, IL15, ITPKB, RPS6KB2, THEMIS, ZFPM1]	[A1CF, AIRE, ASIP, ASPA, ASPM, ATG5, BATF, BCL11B, BCL2, BRAF, C3, CARD11, CCR7, CD1D, CD28, CD3D, CD3E, CD3G, CD4, CD74, CYLD, DEAF1, DOCK2, FOXN1, FOXP3, GATA3, GLI3, IL12B, IL12RB1, IL15, IL23A, IL23R, IL6, IRF4, ITPKB, JAG2, LOXL1, LOXL3, LY9, MECOM, MTOR, PTPN2, PTPRC, PWWP3A, RHOA, RIT1, ROPN1L, RPS6KB2, SHH, SLAMF6, SPN, SRF, STAT3, STAT6, STK11, SYK, TARP, TBX21, THEMIS, ZAP70, ZFPM1]	FALSE
GO:0045061	GO_BiologicalProcess-EBI-UniProt-GOA_27.02.2019_00h00	thymic T cell selection	[3, 7, 8, 9, 10, 11, 12]	[Group08]	7	23.333334	1.2256432333859465E-6	1.6546183650710278E-4	{Group08=1.2166295254792427E-20}	{Group08=1.2166295254792427E-19}	[ASPM, CD28, CD3D, CD3E, GATA3, ITPKB, RPS6KB2]	[A1CF, AIRE, ASIP, ASPA, ASPM, ATG5, C3, CARD11, CCR7, CD28, CD3D, CD3E, CD3G, CD74, DOCK2, FOXN1, GATA3, GLI3, ITPKB, JAG2, MECOM, PTPN2, PTPRC, ROPN1L, RPS6KB2, SHH, SRF, STK11, TARP, ZAP70]	FALSE
GO:0045086	GO_BiologicalProcess-EBI-UniProt-GOA_27.02.2019_00h00	positive regulation of interleukin-2 biosynthetic process	[5, 6, 7, 8, 9]	[Group04, Group07, Group09]	5	35.714287	4.309925234175194E-6	5.646002056769505E-4	{Group04=3.922203759295895E-10, Group07=1.3094989543445803E-15, Group09=4.5548192676488985E-18}	{Group04=2.3533222555775368E-9, Group07=1.0475991634756642E-14, Group09=4.099337340884009E-17}	[CD28, CD3E, CD4, PRKCQ, STAT5B]	[CARD11, CD28, CD3E, CD4, CD80, CD86, GLMN, IL1A, IL1B, IRF4, PRKCQ, PTPRC, PWWP3A, STAT5B]	FALSE
GO:0045619	GO_BiologicalProcess-EBI-UniProt-GOA_27.02.2019_00h00	regulation of lymphocyte differentiation	[5, 6, 7, 8, 9, 10]	[Group07, Group08]	17	8.415842	3.6786299251759114E-7	5.113295595994517E-5	{Group07=1.3094989543445803E-15, Group08=1.2166295254792427E-20}	{Group07=1.0475991634756642E-14, Group08=1.2166295254792427E-19}	[BRCA2, CAMK4, CD28, CTLA4, GATA3, IL15, IL7R, ITPKB, JAK3, MYB, NFATC2, RPS6KB2, STAT5B, TESPA1, TNFRSF18, TOX, ZC3H12A]	[ABL1, ADA, ADAM8, AMBP, ANXA1, AP3B1, AP3D1, ARHGEF28, ATP11C, ATR, AXL, BAD, BCL5, BCL6, BMP4, BRAF, BRCA2, BRF1, BRF2, BTK, BTN2A2, CAMK2G, CAMK4, CAPG, CARD11, CAVIN3, CBFB, CCL19, CCR2, CD2, CD27, CD28, CD46, CD74, CD80, CD83, CD86, CDK2, CDKN2A, CLPTM1, CMM, CPOX, CR1, CTF2P, CTLA4, CYLD, CYP26B1, DROSHA, DTX1, DUSP10, EGR3, ERBB2, ERCC3, ETF1, FANCA, FANCD2, FBXO7, FCRL3, FLT3LG, FOXJ1, FO…	FALSE
GO:0046632	GO_BiologicalProcess-EBI-UniProt-GOA_27.02.2019_00h00	alpha-beta T cell differentiation	[6, 7, 8, 9, 10, 11]	[Group08]	13	10.743802	5.604099261824661E-7	7.733656981318033E-5	{Group08=1.2166295254792427E-20}	{Group08=1.2166295254792427E-19}	[BATF, BCL11B, BCL2, GATA3, ITK, ITPKB, JAK3, LEF1, MYB, RPS6KB2, TCF7, ZC3H12A, ZFPM1]	[ABL1, ADA, ANXA1, AP3B1, AP3D1, ARHGEF28, ATP7A, BATF, BCL11B, BCL2, BCL3, BCL5, BCL6, BLM, BRAF, CBFB, CCL19, CD80, CD83, CD86, CTF2P, DEAF1, EOMES, FOXP1, FOXP3, FUT7, GATA3, GLI3, GPR18, GPR183, HLX, HMGB1, HNF1A, IFNG, IHH, IL12B, IL12RB1, IL18, IL18R1, IL2, IL23A, IL23R, IL27, IL4R, IL6, IRF1, IRF4, ITK, ITPKB, JAK3, KLK8, LEF1, LGALS9, LOXL1, LOXL3, LY9, MALT1, MAP3K20, MTOR, MTTP, MYB, MY…	FALSE
GO:0050671	GO_BiologicalProcess-EBI-UniProt-GOA_27.02.2019_00h00	positive regulation of lymphocyte proliferation	[5, 6, 7, 8]	[Group07]	18	10.227273	8.164333034578818E-9	1.2001569560830862E-6	{Group07=1.3094989543445803E-15}	{Group07=1.0475991634756642E-14}	[BCL2, CCDC88B, CD28, CD3E, CD4, CD40LG, CD6, IL15, IL21, IL6R, IL6ST, JAK3, NFATC2, PRKCQ, RPS6KB2, STAT5B, TFRC, TRAF2]	[ACP5, ADA, AGER, AIF1, AMH, ANXA1, ARHGEF28, ATAD5, BCL2, BCL5, BCL6, BLM, BP2, BST1, BTNL2, CALB2, CAPG, CARD11, CCDC88B, CCL19, CCL5, CCR2, CD1D, CD209, CD24, CD274, CD276, CD28, CD320, CD38, CD3E, CD4, CD40, CD40LG, CD46, CD55, CD6, CD74, CD80, CD81, CD86, CDH11, CHRNB2, CLC, CLCF1, CLECL1, CORO1A, CR2, CTF2P, DHRS4, DNAJA3, EBI3, EFNB1, EPO, EPX, FADD, FCRL3, FGF10, FLT3LG, FOXP3, GATD3A, GP…	FALSE
GO:0050852	GO_BiologicalProcess-EBI-UniProt-GOA_27.02.2019_00h00	T cell receptor signaling pathway	[6, 7, 8, 9, 10]	[Group09]	23	8.041958	7.480691113921595E-9	1.1071422848603962E-6	{Group09=4.5548192676488985E-18}	{Group09=4.099337340884009E-17}	[CD247, CD28, CD3D, CD3E, CD4, FYB1, GATA3, GRAP2, ITK, KCNN4, LAT, LCP2, PLCG1, PLCL1, PRKCQ, PSMA2, RPS6KB2, SKAP1, TESPA1, THEMIS, UBASH3A, WNK1, ZC3H12A]	[ABCB6, ABL1, ADA, AMBP, ARHGEF28, ARHGEF7, ATP6AP1, BCAR1, BCL10, BGLAP, BRAF, BTF3, BTK, BTN1A1, BTN2A1, BTN2A2, BTN2A3P, BTN3A1, BTN3A2, BTN3A3, BTNL10, BTNL2, BTNL3, BTNL8, BTNL9, BTRC, C4BPA, CACNA1F, CACNB3, CARD11, CARD14, CCR7, CD160, CD226, CD247, CD276, CD28, CD300A, CD3D, CD3E, CD3G, CD4, CD81, CEACAM1, CHUK, CLSTN1, CPOX, CREBBP, CRKL, CSE1L, CSK, CTNND1, CUL1, CYCSP24, CYCSP35, CYCSP…	FALSE
GO:0050863	GO_BiologicalProcess-EBI-UniProt-GOA_27.02.2019_00h00	regulation of T cell activation	[5, 6, 7]	[Group07, Group08]	39	9.285714	2.991084298666642E-16	4.785734877866627E-14	{Group07=1.3094989543445803E-15, Group08=1.2166295254792427E-20}	{Group07=1.0475991634756642E-14, Group08=1.2166295254792427E-19}	[BRCA2, CAMK4, CCDC88B, CD28, CD3E, CD4, CD40LG, CD5, CD6, CTLA4, EPHB6, FLOT2, GATA3, GRAP2, ICOS, IL15, IL21, IL6R, IL6ST, IL7R, ITPKB, JAK3, LAT, MYB, NCOA1, NFATC2, PDCD1, PLCL1, PRKCQ, PTPN11, RPS6KB2, STAT5B, TESPA1, TFRC, TIGIT, TNFRSF18, TNFRSF1B, TRAF2, ZC3H12A]	[ABCB6, ABL1, ACP5, ADA, ADAM8, ADORA2A, ADORA2B, AGER, AIF1, AKT1, AMBP, ANXA1, AP3B1, AP3D1, ARG1, ARG2, ARHGEF28, ARHGEF7, BAD, BCL10, BCL5, BCL6, BGLAP, BLM, BMP4, BP2, BRAF, BRCA2, BTLA, BTN2A2, BTNL2, C4BPA, CA5A, CALB2, CAMK2G, CAMK4, CAPG, CARD11, CARD14, CASP3, CAV1, CAV2, CAVIN3, CBFB, CCDC88B, CCL19, CCL2, CCL21, CCL4, CCL5, CCR2, CCR7, CD160, CD1D, CD2, CD209, CD24, CD27, CD274, CD276…	TRUE
GO:0050870	GO_BiologicalProcess-EBI-UniProt-GOA_27.02.2019_00h00	positive regulation of T cell activation	[5, 6, 7, 8]	[Group05, Group07]	30	11.235955	6.051785312488642E-15	9.561820793732054E-13	{Group05=2.9488669360520283E-15, Group07=1.3094989543445803E-15}	{Group05=2.06420685523642E-14, Group07=1.0475991634756642E-14}	[CCDC88B, CD28, CD3E, CD4, CD40LG, CD5, CD6, CTLA4, EPHB6, FLOT2, GATA3, GRAP2, ICOS, IL15, IL21, IL6R, IL6ST, IL7R, ITPKB, JAK3, MYB, NCOA1, PDCD1, PRKCQ, PTPN11, RPS6KB2, STAT5B, TESPA1, TFRC, TRAF2]	[ACP5, ADA, ADAM8, AGER, AIF1, AKT1, AMBP, ANXA1, AP3B1, AP3D1, ARHGEF28, ARHGEF7, BAD, BCL10, BCL5, BCL6, BLM, BP2, BTLA, BTN2A2, BTNL2, CA5A, CALB2, CAPG, CARD11, CAV1, CAV2, CBFB, CCDC88B, CCL19, CCL2, CCL21, CCL4, CCL5, CCR2, CCR7, CD160, CD1D, CD209, CD24, CD27, CD274, CD276, CD28, CD3E, CD4, CD40LG, CD46, CD47, CD5, CD55, CD6, CD74, CD80, CD81, CD83, CD86, CDC42, CDH11, CLECL1, CORO1A, CPOX…	TRUE
KEGG:04630	KEGG_27.02.2019	JAK-STAT signaling pathway	[-1]	[Group02]	14	8.641975	2.9016771059181096E-6	3.859230550871086E-4	{Group02=2.9016771059181096E-6}	{Group02=1.4508385529590547E-5}	[BCL2, CCND3, IL11RA, IL12RB2, IL15, IL21, IL2RB, IL6R, IL6ST, IL7R, JAK3, LIF, PTPN11, STAT5B]	[AKT1, AKT2, AKT3, AOX1, BCL2, BCL2L1, CCND1, CCND2, CCND3, CDKN1A, CISH, CNTF, CNTFR, CREBBP, CRLF2, CSF2, CSF2RA, CSF2RB, CSF3, CSF3R, CSH1, CSH2, CTF1, EGF, EGFR, EP300, EPO, EPOR, FHL1, GFAP, GH1, GH2, GHR, GRB2, HRAS, IFNA1, IFNA10, IFNA13, IFNA14, IFNA16, IFNA17, IFNA2, IFNA21, IFNA4, IFNA5, IFNA6, IFNA7, IFNA8, IFNAR1, IFNAR2, IFNB1, IFNE, IFNG, IFNGR1, IFNGR2, IFNK, IFNL1, IFNL2, IFNL3, I…	TRUE
KEGG:04658	KEGG_27.02.2019	Th1 and Th2 cell differentiation	[-1]	[Group09]	17	18.47826	1.6005328044771668E-12	2.464820518894837E-10	{Group09=4.5548192676488985E-18}	{Group09=4.099337340884009E-17}	[CD247, CD3D, CD3E, CD4, GATA3, IL12RB2, IL2RB, JAK3, LAT, MAF, NFATC1, NFATC2, NFKBIA, NOTCH1, PLCG1, PRKCQ, STAT5B]	[CD247, CD3D, CD3E, CD3G, CD4, CHUK, DLL1, DLL3, DLL4, FOS, GATA3, HLA-DMA, HLA-DMB, HLA-DOA, HLA-DOB, HLA-DPA1, HLA-DPB1, HLA-DQA1, HLA-DQA2, HLA-DQB1, HLA-DRA, HLA-DRB1, HLA-DRB3, HLA-DRB4, HLA-DRB5, IFNG, IFNGR1, IFNGR2, IKBKB, IKBKG, IL12A, IL12B, IL12RB1, IL12RB2, IL13, IL2, IL2RA, IL2RB, IL2RG, IL4, IL4R, IL5, JAG1, JAG2, JAK1, JAK2, JAK3, JUN, LAT, LCK, MAF, MAML1, MAML2, MAML3, MAPK1, MAP…	FALSE
KEGG:04659	KEGG_27.02.2019	Th17 cell differentiation	[-1]	[Group09]	17	15.887851	2.0311747437962646E-11	3.0670738631323593E-9	{Group09=4.5548192676488985E-18}	{Group09=4.099337340884009E-17}	[CD247, CD3D, CD3E, CD4, GATA3, IL21, IL2RB, IL6R, IL6ST, JAK3, LAT, NFATC1, NFATC2, NFKBIA, PLCG1, PRKCQ, STAT5B]	[AHR, CD247, CD3D, CD3E, CD3G, CD4, CHUK, FOS, FOXP3, GATA3, HIF1A, HLA-DMA, HLA-DMB, HLA-DOA, HLA-DOB, HLA-DPA1, HLA-DPB1, HLA-DQA1, HLA-DQA2, HLA-DQB1, HLA-DRA, HLA-DRB1, HLA-DRB3, HLA-DRB4, HLA-DRB5, HSP90AA1, HSP90AB1, IFNG, IFNGR1, IFNGR2, IKBKB, IKBKG, IL12RB1, IL17A, IL17D, IL17F, IL1B, IL1R1, IL1RAP, IL2, IL21, IL21R, IL22, IL23A, IL23R, IL27RA, IL2RA, IL2RB, IL2RG, IL4, IL4R, IL6, IL6R, …	FALSE
KEGG:04660	KEGG_27.02.2019	T cell receptor signaling pathway	[-1]	[Group09]	18	17.821783	6.720264568089467E-13	1.0483612726219568E-10	{Group09=4.5548192676488985E-18}	{Group09=4.099337340884009E-17}	[CD247, CD28, CD3D, CD3E, CD4, CD40LG, CTLA4, GRAP2, ICOS, ITK, LAT, LCP2, NFATC1, NFATC2, NFKBIA, PDCD1, PLCG1, PRKCQ]	[AKT1, AKT2, AKT3, BCL10, BUB1B-PAK6, CARD11, CBLB, CD247, CD28, CD3D, CD3E, CD3G, CD4, CD40LG, CD8A, CD8B, CDC42, CDK4, CHUK, CSF2, CTLA4, DLG1, FOS, FYN, GRAP2, GRB2, GSK3B, HRAS, ICOS, IFNG, IKBKB, IKBKG, IL10, IL2, IL4, IL5, ITK, JUN, KRAS, LAT, LCK, LCP2, MALT1, MAP2K1, MAP2K2, MAP2K7, MAP3K14, MAP3K7, MAP3K8, MAPK1, MAPK11, MAPK12, MAPK13, MAPK14, MAPK3, MAPK9, NCK1, NCK2, NFATC1, NFATC2, N…	FALSE
KEGG:05340	KEGG_27.02.2019	Primary immunodeficiency	[-1]	[Group09]	7	18.918919	5.524349591554935E-6	7.181654469021416E-4	{Group09=4.5548192676488985E-18}	{Group09=4.099337340884009E-17}	[CD3D, CD3E, CD4, CD40LG, ICOS, IL7R, JAK3]	[ADA, AICDA, AIRE, BLNK, BTK, CD19, CD3D, CD3E, CD4, CD40, CD40LG, CD79A, CD8A, CD8B, CIITA, DCLRE1C, ICOS, IGLL1, IKBKG, IL2RG, IL7R, JAK3, LCK, LOC102723407, ORAI1, PTPRC, RAG1, RAG2, RFX5, RFXANK, RFXAP, TAP1, TAP2, TNFRSF13B, TNFRSF13C, UNG, ZAP70]	FALSE
R-HSA:202216	REACTOME_Reactions_27.02.2019	Phosphorylation of SLP-76	[-1]	[Group09]	7	33.333332	8.119613733852016E-8	1.1448655364731343E-5	{Group09=4.5548192676488985E-18}	{Group09=4.099337340884009E-17}	[CD247, CD3D, CD3E, CD4, GRAP2, LAT, LCP2]	[CD247, CD3D, CD3E, CD3G, CD4, GRAP2, HLA-DPA1, HLA-DPB1, HLA-DQA1, HLA-DQA2, HLA-DQB1, HLA-DQB2, HLA-DRA, HLA-DRB1, HLA-DRB3, HLA-DRB4, HLA-DRB5, LAT, LCK, LCP2, ZAP70]	FALSE
R-HSA:202241	REACTOME_Reactions_27.02.2019	Recruitment of SLP-76 to Gads	[-1]	[Group09]	3	100.0	6.924771223829155E-6	8.863707166501319E-4	{Group09=4.5548192676488985E-18}	{Group09=4.099337340884009E-17}	[GRAP2, LAT, LCP2]	[GRAP2, LAT, LCP2]	FALSE
R-HSA:202245	REACTOME_Reactions_27.02.2019	Phosphorylation of TBSMs in LAT	[-1]	[Group09]	5	26.31579	2.3135573936442667E-5	0.0028225400202460055	{Group09=4.5548192676488985E-18}	{Group09=4.099337340884009E-17}	[CD247, CD3D, CD3E, CD4, LAT]	[CD247, CD3D, CD3E, CD3G, CD4, HLA-DPA1, HLA-DPB1, HLA-DQA1, HLA-DQA2, HLA-DQB1, HLA-DQB2, HLA-DRA, HLA-DRB1, HLA-DRB3, HLA-DRB4, HLA-DRB5, LAT, LCK, ZAP70]	FALSE
R-HSA:202248	REACTOME_Reactions_27.02.2019	Phosphorylation of PLC-gamma1	[-1]	[Group09]	9	37.5	3.1308697090960595E-10	4.6963045636440896E-8	{Group09=4.5548192676488985E-18}	{Group09=4.099337340884009E-17}	[CD247, CD3D, CD3E, CD4, GRAP2, ITK, LAT, LCP2, PLCG1]	[CD101, CD247, CD3D, CD3E, CD3G, CD4, GRAP2, HLA-DPA1, HLA-DPB1, HLA-DQA1, HLA-DQA2, HLA-DQB1, HLA-DQB2, HLA-DRA, HLA-DRB1, HLA-DRB3, HLA-DRB4, HLA-DRB5, ITK, LAT, LCK, LCP2, PLCG1, ZAP70]	FALSE
R-HSA:202307	REACTOME_Reactions_27.02.2019	Change of PKC theta conformation	[-1]	[Group04, Group09]	5	27.777779	1.7317884970587805E-5	0.002147417736352888	{Group04=3.922203759295895E-10, Group09=4.5548192676488985E-18}	{Group04=2.3533222555775368E-9, Group09=4.099337340884009E-17}	[CD247, CD3D, CD3E, CD4, PRKCQ]	[CD247, CD3D, CD3E, CD3G, CD4, HLA-DPA1, HLA-DPB1, HLA-DQA1, HLA-DQA2, HLA-DQB1, HLA-DQB2, HLA-DRA, HLA-DRB1, HLA-DRB3, HLA-DRB4, HLA-DRB5, LCK, PRKCQ]	FALSE
R-HSA:202331	REACTOME_Reactions_27.02.2019	Recruitment of PLC-gamma1 to SLP-76	[-1]	[Group09]	4	100.0	1.3127872129352803E-7	1.8379020981093925E-5	{Group09=4.5548192676488985E-18}	{Group09=4.099337340884009E-17}	[GRAP2, LAT, LCP2, PLCG1]	[GRAP2, LAT, LCP2, PLCG1]	FALSE
R-HSA:202375	REACTOME_Reactions_27.02.2019	Recruitment of ITK to SLP-76	[-1]	[Group09]	4	100.0	1.3127872129352803E-7	1.8379020981093925E-5	{Group09=4.5548192676488985E-18}	{Group09=4.099337340884009E-17}	[GRAP2, ITK, LAT, LCP2]	[GRAP2, ITK, LAT, LCP2]	FALSE
R-HSA:202403	REACTOME_Pathways_27.02.2019	TCR signaling	[-1]	[Group09]	14	11.764706	6.521996814509839E-8	9.26123547660397E-6	{Group09=4.5548192676488985E-18}	{Group09=4.099337340884009E-17}	[CD247, CD3D, CD3E, CD4, EVL, FYB1, GRAP2, ITK, LAT, LCP2, NFKBIA, PLCG1, PRKCQ, PSMA2]	[BCL10, BTRC, CARD11, CD101, CD247, CD3D, CD3E, CD3G, CD4, CDC34, CHUK, CSK, CUL1, ENAH, EVL, FBXW11, FYB1, GRAP2, HLA-DPA1, HLA-DPB1, HLA-DQA1, HLA-DQA2, HLA-DQB1, HLA-DQB2, HLA-DRA, HLA-DRB1, HLA-DRB3, HLA-DRB4, HLA-DRB5, IKBKB, IKBKG, INPP5D, ITK, LAT, LCK, LCP2, MALT1, MAP3K7, NCK1, NFKB1, NFKBIA, PAG1, PAK1, PAK2, PAK3, PDPK1, PIK3CA, PIK3CB, PIK3R1, PIK3R2, PLCG1, PRKCQ, PSMA1, PSMA2, PSMA3…	FALSE
R-HSA:202433	REACTOME_Pathways_27.02.2019	Generation of second messenger molecules	[-1]	[Group09]	11	33.333332	1.4209768696261429E-11	2.159884841831737E-9	{Group09=4.5548192676488985E-18}	{Group09=4.099337340884009E-17}	[CD247, CD3D, CD3E, CD4, EVL, FYB1, GRAP2, ITK, LAT, LCP2, PLCG1]	[CD101, CD247, CD3D, CD3E, CD3G, CD4, ENAH, EVL, FYB1, GRAP2, HLA-DPA1, HLA-DPB1, HLA-DQA1, HLA-DQA2, HLA-DQB1, HLA-DQB2, HLA-DRA, HLA-DRB1, HLA-DRB3, HLA-DRB4, HLA-DRB5, ITK, LAT, LCK, LCP2, NCK1, PAK1, PAK2, PAK3, PLCG1, VASP, WAS, ZAP70]	FALSE
R-HSA:213407	REACTOME_Reactions_27.02.2019	Disassociation of PLC-gamma1 from SLP-76	[-1]	[Group09]	4	100.0	1.3127872129352803E-7	1.8379020981093925E-5	{Group09=4.5548192676488985E-18}	{Group09=4.099337340884009E-17}	[GRAP2, LAT, LCP2, PLCG1]	[GRAP2, LAT, LCP2, PLCG1]	FALSE
R-HSA:2396594	REACTOME_Reactions_27.02.2019	Phosphorylation of SLP-76 by p-SYK	[-1]	[Group09]	5	26.31579	2.3135573936442667E-5	0.0028225400202460055	{Group09=4.5548192676488985E-18}	{Group09=4.099337340884009E-17}	[GRAP2, KLRD1, LAT, LCP2, PLCG1]	[B2M, FYN, GRAP2, GRB2, HLA-E, KLRC2, KLRC4-KLRK1, KLRD1, KLRK1, LAT, LCK, LCP2, PLCG1, PLCG2, SHC1, SOS1, SYK, TREM2, TYROBP]	FALSE
R-HSA:2396606	REACTOME_Reactions_27.02.2019	Recruitment of PLC-gamma to SLP-76 and p-5Y-LAT	[-1]	[Group09]	4	50.0	8.646502239613081E-6	0.0010894592821912483	{Group09=4.5548192676488985E-18}	{Group09=4.099337340884009E-17}	[GRAP2, LAT, LCP2, PLCG1]	[GRAP2, GRB2, LAT, LCP2, PLCG1, PLCG2, SHC1, SOS1]	FALSE
R-HSA:2424481	REACTOME_Reactions_27.02.2019	Recruitment of VAV and BTK to p-SLP-76	[-1]	[Group09]	4	36.363636	3.89457080045082E-5	0.004634539252536475	{Group09=4.5548192676488985E-18}	{Group09=4.099337340884009E-17}	[GRAP2, LAT, LCP2, PLCG1]	[BTK, GRAP2, GRB2, LAT, LCP2, PLCG1, PLCG2, SHC1, SOS1, VAV2, VAV3]	FALSE
R-HSA:2424485	REACTOME_Reactions_27.02.2019	Release of p-PLCG1	[-1]	[Group09]	4	36.363636	3.89457080045082E-5	0.004634539252536475	{Group09=4.5548192676488985E-18}	{Group09=4.099337340884009E-17}	[GRAP2, LAT, LCP2, PLCG1]	[BTK, GRAP2, GRB2, LAT, LCP2, PLCG1, PLCG2, SHC1, SOS1, VAV2, VAV3]	FALSE
R-HSA:2730833	REACTOME_Reactions_27.02.2019	Phosphorylation of TEC kinases by p-SYK	[-1]	[Group09]	5	25.0	3.036560023161453E-5	0.0036438720277937437	{Group09=4.5548192676488985E-18}	{Group09=4.099337340884009E-17}	[GRAP2, ITK, LAT, LCP2, PLCG1]	[BTK, FCER1A, FCER1G, GRAP2, GRB2, ITK, LAT, LCP2, LYN, MS4A2, PLCG1, PLCG2, SHC1, SOS1, SYK, TEC, TXK, VAV1, VAV2, VAV3]	FALSE
R-HSA:2730841	REACTOME_Reactions_27.02.2019	Phosphorylation and activation of VAV	[-1]	[Group09]	4	36.363636	3.89457080045082E-5	0.004634539252536475	{Group09=4.5548192676488985E-18}	{Group09=4.099337340884009E-17}	[GRAP2, LAT, LCP2, PLCG1]	[GRAP2, GRB2, LAT, LCP2, PLCG1, PLCG2, SHC1, SOS1, VAV1, VAV2, VAV3]	FALSE
R-HSA:2730847	REACTOME_Reactions_27.02.2019	Hydrolysis of PIP2 by PLCG	[-1]	[Group09]	5	33.333332	6.363689662673142E-6	8.209159664848353E-4	{Group09=4.5548192676488985E-18}	{Group09=4.099337340884009E-17}	[GRAP2, ITK, LAT, LCP2, PLCG1]	[BTK, GRAP2, GRB2, ITK, LAT, LCP2, PLCG1, PLCG2, SHC1, SOS1, TEC, TXK, VAV1, VAV2, VAV3]	FALSE
R-HSA:2730858	REACTOME_Reactions_27.02.2019	Autophosphorylation of BTK/ITK	[-1]	[Group09]	5	33.333332	6.363689662673142E-6	8.209159664848353E-4	{Group09=4.5548192676488985E-18}	{Group09=4.099337340884009E-17}	[GRAP2, ITK, LAT, LCP2, PLCG1]	[BTK, GRAP2, GRB2, ITK, LAT, LCP2, PLCG1, PLCG2, SHC1, SOS1, TEC, TXK, VAV1, VAV2, VAV3]	FALSE
R-HSA:2730885	REACTOME_Reactions_27.02.2019	Recruitment of TEC kinases to p-SLP-76	[-1]	[Group09]	5	33.333332	6.363689662673142E-6	8.209159664848353E-4	{Group09=4.5548192676488985E-18}	{Group09=4.099337340884009E-17}	[GRAP2, ITK, LAT, LCP2, PLCG1]	[BTK, GRAP2, GRB2, ITK, LAT, LCP2, PLCG1, PLCG2, SHC1, SOS1, TEC, TXK, VAV1, VAV2, VAV3]	FALSE
R-HSA:2730888	REACTOME_Reactions_27.02.2019	Phosphorylation of PLC-gamma	[-1]	[Group09]	5	25.0	3.036560023161453E-5	0.0036438720277937437	{Group09=4.5548192676488985E-18}	{Group09=4.099337340884009E-17}	[GRAP2, ITK, LAT, LCP2, PLCG1]	[BTK, FCER1A, FCER1G, GRAP2, GRB2, ITK, LAT, LCP2, LYN, MS4A2, PLCG1, PLCG2, SHC1, SOS1, SYK, TEC, TXK, VAV1, VAV2, VAV3]	FALSE
R-HSA:2730892	REACTOME_Reactions_27.02.2019	Recruitment of VAV to p-SLP-76	[-1]	[Group09]	4	36.363636	3.89457080045082E-5	0.004634539252536475	{Group09=4.5548192676488985E-18}	{Group09=4.099337340884009E-17}	[GRAP2, LAT, LCP2, PLCG1]	[GRAP2, GRB2, LAT, LCP2, PLCG1, PLCG2, SHC1, SOS1, VAV1, VAV2, VAV3]	FALSE
R-HSA:2871809	REACTOME_Pathways_27.02.2019	FCERI mediated Ca+2 mobilization	[-1]	[Group09]	7	21.212122	2.448097040006233E-6	3.280450033608352E-4	{Group09=4.5548192676488985E-18}	{Group09=4.099337340884009E-17}	[GRAP2, ITK, LAT, LCP2, NFATC1, NFATC2, PLCG1]	[AHCYL1, BTK, CALM1, CALM2, CALM3, FCER1A, FCER1G, GRAP2, GRB2, ITK, ITPR1, ITPR2, ITPR3, LAT, LCP2, LYN, MS4A2, NFATC1, NFATC2, NFATC3, PLCG1, PLCG2, PPP3CA, PPP3CB, PPP3R1, SHC1, SOS1, SYK, TEC, TXK, VAV1, VAV2, VAV3]	FALSE
R-HSA:388841	REACTOME_Pathways_27.02.2019	Costimulation by the CD28 family	[-1]	[Group05, Group09]	10	14.285714	8.232935505571136E-7	1.1279121642632456E-4	{Group05=2.9488669360520283E-15, Group09=4.5548192676488985E-18}	{Group05=2.06420685523642E-14, Group09=4.099337340884009E-17}	[CD247, CD28, CD3D, CD3E, CD4, CTLA4, GRAP2, ICOS, PDCD1, PTPN11]	[AKT1, AKT2, AKT3, BTLA, CD247, CD274, CD28, CD3D, CD3E, CD3G, CD4, CD80, CD86, CDC42, CSK, CTLA4, FYN, GRAP2, GRB2, HLA-DPA1, HLA-DPB1, HLA-DQA1, HLA-DQA2, HLA-DQB1, HLA-DQB2, HLA-DRA, HLA-DRB1, HLA-DRB3, HLA-DRB4, HLA-DRB5, ICOS, ICOSLG, LCK, LOC102723996, LYN, MAP3K14, MAP3K8, MAPKAP1, MLST8, MTOR, PAK1, PAK2, PAK3, PDCD1, PDCD1LG2, PDPK1, PIK3CA, PIK3R1, PIK3R2, PIK3R3, PPP2CA, PPP2CB, PPP2R1…	FALSE
R-HSA:389758	REACTOME_Reactions_27.02.2019	Dephosphorylation of CD3-zeta by PD-1 bound phosphatases	[-1]	[Group09]	6	26.086956	3.586354308890987E-6	4.733987687736103E-4	{Group09=4.5548192676488985E-18}	{Group09=4.099337340884009E-17}	[CD247, CD3D, CD3E, CD4, PDCD1, PTPN11]	[CD247, CD274, CD3D, CD3E, CD3G, CD4, CSK, HLA-DPA1, HLA-DPB1, HLA-DQA1, HLA-DQA2, HLA-DQB1, HLA-DQB2, HLA-DRA, HLA-DRB1, HLA-DRB3, HLA-DRB4, HLA-DRB5, LCK, PDCD1, PDCD1LG2, PTPN11, PTPN6]	FALSE
R-HSA:389948	REACTOME_Pathways_27.02.2019	PD-1 signaling	[-1]	[Group09]	6	26.086956	3.586354308890987E-6	4.733987687736103E-4	{Group09=4.5548192676488985E-18}	{Group09=4.099337340884009E-17}	[CD247, CD3D, CD3E, CD4, PDCD1, PTPN11]	[CD247, CD274, CD3D, CD3E, CD3G, CD4, CSK, HLA-DPA1, HLA-DPB1, HLA-DQA1, HLA-DQA2, HLA-DQB1, HLA-DQB2, HLA-DRA, HLA-DRB1, HLA-DRB3, HLA-DRB4, HLA-DRB5, LCK, PDCD1, PDCD1LG2, PTPN11, PTPN6]	FALSE
R-HSA:8983371	REACTOME_Reactions_27.02.2019	IL15:IL15RA:p-Y-IL2RB:p-Y-JAK1:p-Y-IL2RG:p-Y-JAK3 phosphorylates STAT3 and STAT5	[-1]	[Group06]	4	44.444443	1.5328865112477775E-5	0.001916108139059722	{Group06=1.5328865112477775E-5}	{Group06=4.5986595337433326E-5}	[IL15, IL2RB, JAK3, STAT5B]	[IL15, IL15RA, IL2RB, IL2RG, JAK1, JAK3, STAT3, STAT5A, STAT5B]	TRUE
R-HSA:8983374	REACTOME_Reactions_27.02.2019	p-Y-STAT3 and p-STAT5 dissociates from IL15:IL15RA:IL2RB:p-JAK1:IL2RG:p-JAK3:p-Y-STAT3:p-STAT5	[-1]	[Group06]	4	44.444443	1.5328865112477775E-5	0.001916108139059722	{Group06=1.5328865112477775E-5}	{Group06=4.5986595337433326E-5}	[IL15, IL2RB, JAK3, STAT5B]	[IL15, IL15RA, IL2RB, IL2RG, JAK1, JAK3, STAT3, STAT5A, STAT5B]	FALSE
R-HSA:8983378	REACTOME_Reactions_27.02.2019	IL15:IL15RA:p-Y-IL2RB:p-Y-JAK1:p-Y-IL2RG:p-Y-JAK3 binds STAT3 and STAT5	[-1]	[Group06]	4	44.444443	1.5328865112477775E-5	0.001916108139059722	{Group06=1.5328865112477775E-5}	{Group06=4.5986595337433326E-5}	[IL15, IL2RB, JAK3, STAT5B]	[IL15, IL15RA, IL2RB, IL2RG, JAK1, JAK3, STAT3, STAT5A, STAT5B]	FALSE
WP:2583	WikiPathways_27.02.2019	T-Cell Receptor and Co-stimulatory Signaling	[-1]	[Group09]	7	24.137932	9.552555735332717E-7	1.2991475800052494E-4	{Group09=4.5548192676488985E-18}	{Group09=4.099337340884009E-17}	[CD28, CTLA4, ITK, NFATC2, NFKBIA, PDCD1, PLCG1]	[AKT1, CALM1, CALM2, CD28, CD8A, CD8B, CSNK1A1, CTLA4, DYRK1A, DYRK2, FYN, GSK3A, GSK3B, IL2, ITK, LCK, NFATC2, NFKB1, NFKBIA, PDCD1, PDK1, PLCG1, PPP3CA, PRKCA, PTEN, PTPN6, RASA1, RASGRP1, ZAP70]	FALSE
WP:3863	WikiPathways_27.02.2019	T-Cell antigen Receptor (TCR) pathway during Staphylococcus aureus infection	[-1]	[Group09]	15	24.193548	5.13121558404842E-13	8.056008466956018E-11	{Group09=4.5548192676488985E-18}	{Group09=4.099337340884009E-17}	[CD28, CD3D, CD4, CD40LG, CTLA4, GRAP2, ICOS, ITK, LAT, LCP2, NFATC2, NFKBIA, PDCD1, PLCG1, PRKCQ]	[AHSA1, AKT1, BCL10, CALM1, CALM2, CARD11, CBL, CD28, CD3D, CD4, CD40LG, CD8A, CDK4, CHP1, CHUK, CSF2, CTLA4, DLG1, FOS, FYN, GRAP2, GRB2, GSK3B, ICOS, IFNG, IKBKB, IKBKG, IL10, IL2, IL4, IL5, ITK, JUN, LAT, LCK, LCP2, MALT1, MAP2K1, MAP2K2, MAP2K7, MAP3K14, MAP3K7, MAP3K8, MAPK3, MAPK9, NCK1, NFATC2, NFKB1, NFKBIA, PAK1, PDCD1, PDK1, PIK3CA, PLCG1, PRKCQ, PTPN6, PTPRC, RAF1, RRAS, SOS1, TNF, ZAP…	FALSE
WP:69	WikiPathways_27.02.2019	T-Cell antigen Receptor (TCR) Signaling Pathway	[-1]	[Group09]	20	21.978022	4.781434065623063E-16	7.602480164340669E-14	{Group09=4.5548192676488985E-18}	{Group09=4.099337340884009E-17}	[CD247, CD28, CD3D, CD3E, CD4, FYB1, GATA3, GRAP2, ICOS, ITK, LAT, LCP2, NFATC1, NFATC2, NFKBIA, PLCG1, PRKCQ, PSTPIP1, PTPN11, SKAP1]	[AKT1, ATF2, BCL10, CARD11, CBL, CBLB, CCR5, CD247, CD28, CD3D, CD3E, CD3G, CD4, CD83, CD8A, CDC42, CHUK, CREB1, CRK, CRKL, DBNL, FAS, FOS, FYB1, FYN, GAB2, GATA3, GRAP2, GRB2, HRAS, ICOS, IKBKB, IKBKG, IL15RA, IL17A, IL1A, IL1B, IL6, IL9, IRF4, ITK, ITPR1, JUN, LAT, LCP2, LHB, MALT1, MAP2K1, MAP2K2, MAP3K14, MAP3K7, MAP3K8, MAP4K1, MAPK1, MAPK14, MAPK3, MAPK8, MAPK9, MIR6837, NCK1, NFATC1, NFATC…	TRUE
Down regulated
GOID	Ontology Source	GOTerm	GOLevels	GOGroups	Nr. Genes	% Associated Genes	Term PValue	Term PValue Corrected with Bonferroni step down	Group PValue	Group PValue Corrected with Bonferroni step down	Associated Genes Found	All Associated Genes
GO:0003148	GO_BiologicalProcess-EBI-UniProt-GOA_27.02.2019_00h00	outflow tract septum morphogenesis	[4, 5, 6, 7, 8, 9, 10]	[Group0]	6	17.142857	3.700900936975412E-5	0.004182018058782216	{Group0=3.700900936975412E-5}	{Group0=3.700900936975412E-5}	[BMP4, LRP2, RARB, ROBO2, TGFB2, TGFBR2]	[BAG1, BMP4, BMPR1A, BMPR2, ENG, FGF8, FGFR2, GATA6, ISL1, LRP2, MSX2, NAP1L1, NELL1, NELL2, NKX2-5, NRP1, NRP2, OPTN, PARVA, RARA, RARB, ROBO1, ROBO2, RTN3, SAFB, SEMA3C, SMAD4, SMAD6, SMAD9, TBX1, TBX2, TBX20, TGFB2, TGFBR2, ZFPM2]
GO:0030183	GO_BiologicalProcess-EBI-UniProt-GOA_27.02.2019_00h00	B cell differentiation	[5, 6, 7, 8, 9, 10]	[Group8]	15	8.77193	6.060100906355771E-7	7.878131178262502E-5	{Group8=3.964956840007208E-13}	{Group8=3.568461156006487E-12}	[BLNK, BTK, CD19, CD79A, CD79B, FCGR2B, HDAC9, HHEX, MS4A1, PLCG2, PTPN6, SYK, TPD52, VCAM1, XBP1]	[ABL1, ACP5, ADA, ADAM17, ADGRG3, AGFG1, AICDA, AKIRIN2, AMBP, ATM, ATP11C, ATR, AZF1, BAD, BAK1, BAX, BCL2, BCL3, BCL5, BCL6, BLNK, BRF1, BRF2, BTK, C17orf99, CARD11, CD19, CD27, CD40LG, CD79A, CD79B, CDH17, CDK7, CEBPG, CLC, CLCF1, CMTM7, CPOX, CR2, CREBRF, CYLD, DCAF1, DCLRE1C, DLL1, DNAJB9, DOCK10, DOCK11, EP300, ETF1, FCGR2A, FCGR2B, FCGR2C, FCRL3, FLT3, FNIP1, FSTL1, FZD3, FZD9, GON4L, GPR1…
GO:0030888	GO_BiologicalProcess-EBI-UniProt-GOA_27.02.2019_00h00	regulation of B cell proliferation	[6, 7, 8]	[Group1]	12	15.0	2.2700829508912755E-8	3.064611983703222E-6	{Group1=2.2700829508912755E-8}	{Group1=1.8160663607130204E-7}	[BTK, CD22, CD40, CD74, FCGR2B, IRS2, LYN, MEF2C, MNDA, MZB1, TNFRSF13C, VAV3]	[ADA, ADCYAP1, AHR, AMH, ATAD5, ATM, BCL2, BCL5, BCL6, BST1, BTK, CARD11, CASP3, CD22, CD300A, CD320, CD38, CD40, CD74, CD81, CDK2, CDKN2A, CHRNB2, CLC, CLCF1, CMM, CTLA4, F2RL3, FCGR2A, FCGR2B, FCGR2C, FCRL3, GPR183, IKZF3, IL10, IL13, IL2, IL21, IL4, IL5, IL7, INPP5D, IRS2, LYN, MAL, MEF2C, MIF, MNDA, MRTFA, MZB1, NCKAP1L, NFATC2, PAK1, PAWR, PELI1, PGAP2, PKN1, PRDM6, PROK1, PTPRC, PWAR4, RC3H…
GO:0050853	GO_BiologicalProcess-EBI-UniProt-GOA_27.02.2019_00h00	B cell receptor signaling pathway	[6, 7, 8, 9, 10]	[Group8]	17	10.059172	1.4148620456256209E-8	1.9383610025071006E-6	{Group8=3.964956840007208E-13}	{Group8=3.568461156006487E-12}	[BTK, CD19, CD22, CD79A, CD79B, FCGR2B, LAT2, LYN, MEF2C, MNDA, MS4A1, PAX5, PLCG2, PTPN6, STAP1, SYK, VAV3]	[ABL1, AMBP, BAX, BCAR1, BCL2, BLK, BMX, BTK, CBFB, CD19, CD22, CD300A, CD38, CD79A, CD79B, CD81, CLSTN1, CMTM3, CPOX, CSE1L, CTLA4, CTNND1, ELF1, ELF2, ELOF1, FCGR2A, FCGR2B, FCGR2C, FCRL3, FERMT2, FOXP1, GAL, GCSAM, GCSAML, GPS2, IGHA1, IGHA2, IGHD, IGHE, IGHG1, IGHG2, IGHG3, IGHG4, IGHM, IGHV1-18, IGHV1-2, IGHV1-24, IGHV1-3, IGHV1-45, IGHV1-46, IGHV1-58, IGHV1-69, IGHV1-69-2, IGHV1-69D, IGHV1-…
GO:0050855	GO_BiologicalProcess-EBI-UniProt-GOA_27.02.2019_00h00	regulation of B cell receptor signaling pathway	[5, 6, 7, 8, 9, 10, 11]	[Group8]	7	20.0	2.774224047085975E-6	3.4677800588574687E-4	{Group8=3.964956840007208E-13}	{Group8=3.568461156006487E-12}	[CD19, CD22, FCGR2B, LYN, PAX5, PTPN6, STAP1]	[AMBP, BLK, CBFB, CD19, CD22, CD300A, CD81, CMTM3, CPOX, ELF1, ELF2, ELOF1, FCGR2A, FCGR2B, FCGR2C, FCRL3, FOXP1, GAL, GCSAM, GCSAML, GPS2, LPXN, LYN, NFAM1, PAX5, PLCL2, PRKCB, PRKCH, PTPN22, PTPN6, PTPRC, RUNX1, SLC39A10, STAP1, UXT]
KEGG:04380	KEGG_27.02.2019	Osteoclast differentiation	[-1]	[Group5]	13	10.15625	6.486425488401307E-7	8.367488880037686E-5	{Group5=6.486425488401307E-7}	{Group5=4.540497841880915E-6}	[BLNK, BTK, CSF1R, FCGR2B, GAB2, IFNGR1, IFNGR2, NCF1, PLCG2, PPP3CA, SYK, TGFB2, TGFBR2]	[ACP5, AKT1, AKT2, AKT3, BLNK, BTK, CALCR, CAMK4, CHUK, CREB1, CSF1, CSF1R, CTSK, CYBA, CYLD, FCGR1A, FCGR2A, FCGR2B, FCGR2C, FCGR3A, FCGR3B, FHL2, FOS, FOSB, FOSL1, FOSL2, FYN, GAB2, GRB2, IFNAR1, IFNAR2, IFNB1, IFNG, IFNGR1, IFNGR2, IKBKB, IKBKG, IL1A, IL1B, IL1R1, IRF9, ITGB3, JAK1, JUN, JUNB, JUND, LCK, LCP2, LILRA1, LILRA2, LILRA3, LILRA4, LILRA5, LILRA6, LILRB1, LILRB2, LILRB3, LILRB4, LILR…
KEGG:04514	KEGG_27.02.2019	Cell adhesion molecules (CAMs)	[-1]	[Group6]	12	8.333333	1.3729722372729122E-5	0.0016201072399820364	{Group6=1.3729722372729122E-5}	{Group6=2.7459444745458244E-5}	[CD22, CD40, CD86, CNTNAP2, ICOSLG, JAM3, NRXN1, NRXN3, SDC3, SELL, VCAM1, VCAN]	[ALCAM, CADM1, CADM3, CD2, CD22, CD226, CD274, CD276, CD28, CD34, CD4, CD40, CD40LG, CD58, CD6, CD80, CD86, CD8A, CD8B, CD99, CDH1, CDH15, CDH2, CDH3, CDH4, CDH5, CLDN1, CLDN10, CLDN11, CLDN14, CLDN15, CLDN16, CLDN17, CLDN18, CLDN19, CLDN2, CLDN20, CLDN22, CLDN23, CLDN24, CLDN25, CLDN3, CLDN4, CLDN5, CLDN6, CLDN7, CLDN8, CLDN9, CNTN1, CNTN2, CNTNAP1, CNTNAP2, CTLA4, ESAM, F11R, GLG1, HLA-A, HLA-B…
KEGG:04640	KEGG_27.02.2019	Hematopoietic cell lineage	[-1]	[Group7]	10	10.3092785	1.1222271559121451E-5	0.001346672587094574	{Group7=1.1222271559121451E-5}	{Group7=4.4889086236485804E-5}	[CD19, CD22, CD24, CD37, CD55, CD9, CSF1R, FCER2, ITGA1, MS4A1]	[ANPEP, CD14, CD19, CD1A, CD1B, CD1C, CD1D, CD1E, CD2, CD22, CD24, CD33, CD34, CD36, CD37, CD38, CD3D, CD3E, CD3G, CD4, CD44, CD5, CD55, CD59, CD7, CD8A, CD8B, CD9, CR1, CR2, CSF1, CSF1R, CSF2, CSF2RA, CSF3, CSF3R, DNTT, EPO, EPOR, FCER2, FCGR1A, FLT3, FLT3LG, GP1BA, GP1BB, GP5, GP9, GYPA, HLA-DMA, HLA-DMB, HLA-DOA, HLA-DOB, HLA-DPA1, HLA-DPB1, HLA-DQA1, HLA-DQA2, HLA-DQB1, HLA-DRA, HLA-DRB1, HLA…
KEGG:04662	KEGG_27.02.2019	B cell receptor signaling pathway	[-1]	[Group8]	17	23.943663	8.111366787554993E-15	1.168036817407919E-12	{Group8=3.964956840007208E-13}	{Group8=3.568461156006487E-12}	[BLNK, BTK, CD19, CD22, CD72, CD79A, CD79B, FCGR2B, LYN, PIK3AP1, PLCG2, PPP3CA, PTPN6, RASGRP3, SYK, VAV2, VAV3]	[AKT1, AKT2, AKT3, BCL10, BLNK, BTK, CARD11, CD19, CD22, CD72, CD79A, CD79B, CD81, CHUK, CR2, DAPP1, FCGR2B, FOS, GRB2, GSK3B, HRAS, IFITM1, IKBKB, IKBKG, INPP5D, INPPL1, JUN, KRAS, LILRB3, LOC102723407, LYN, MALT1, MAP2K1, MAP2K2, MAPK1, MAPK3, NFATC1, NFATC2, NFATC3, NFKB1, NFKBIA, NFKBIB, NFKBIE, NRAS, PIK3AP1, PIK3CA, PIK3CB, PIK3CD, PIK3R1, PIK3R2, PIK3R3, PLCG2, PPP3CA, PPP3CB, PPP3CC, PPP3…
KEGG:04666	KEGG_27.02.2019	Fc gamma R-mediated phagocytosis	[-1]	[Group8]	13	14.285714	1.0780465320445028E-8	1.487704214221414E-6	{Group8=3.964956840007208E-13}	{Group8=3.568461156006487E-12}	[FCGR2B, GAB2, HCK, LYN, MARCKS, NCF1, PIP5K1B, PLCG2, PLPP3, PRKCE, SYK, VAV2, VAV3]	[AKT1, AKT2, AKT3, AMPH, ARF6, ARPC1A, ARPC1B, ARPC2, ARPC3, ARPC4, ARPC5, ARPC5L, ASAP1, ASAP2, ASAP3, BIN1, CDC42, CFL1, CFL2, CRK, CRKL, DNM2, DOCK2, FCGR1A, FCGR2A, FCGR2B, FCGR3A, GAB2, GSN, HCK, INPP5D, INPPL1, LAT, LIMK1, LIMK2, LOC102723407, LYN, MAP2K1, MAPK1, MAPK3, MARCKS, MARCKSL1, MYO10, NCF1, PAK1, PIK3CA, PIK3CB, PIK3CD, PIK3R1, PIK3R2, PIK3R3, PIP5K1A, PIP5K1B, PIP5K1C, PLA2G4A, P…
KEGG:05340	KEGG_27.02.2019	Primary immunodeficiency	[-1]	[Group8]	7	18.918919	4.1161301112410655E-6	5.0216787357141E-4	{Group8=3.964956840007208E-13}	{Group8=3.568461156006487E-12}	[BLNK, BTK, CD19, CD40, CD79A, CIITA, TNFRSF13C]	[ADA, AICDA, AIRE, BLNK, BTK, CD19, CD3D, CD3E, CD4, CD40, CD40LG, CD79A, CD8A, CD8B, CIITA, DCLRE1C, ICOS, IGLL1, IKBKG, IL2RG, IL7R, JAK3, LCK, LOC102723407, ORAI1, PTPRC, RAG1, RAG2, RFX5, RFXANK, RFXAP, TAP1, TAP2, TNFRSF13B, TNFRSF13C, UNG, ZAP70]
R-HSA:1112666	REACTOME_Reactions_27.02.2019	BLNK (SLP-65) Signalosome hydrolyzes phosphatidyinositol bisphosphate forming diacylglycerol and inositol-1,4,5-trisphosphate	[-1]	[Group8]	6	54.545456	1.5260324006034008E-8	2.075404064820625E-6	{Group8=3.964956840007208E-13}	{Group8=3.568461156006487E-12}	[BLNK, BTK, CD79A, CD79B, PLCG2, SYK]	[BLNK, BTK, CD79A, CD79B, GRB2, NCK1, PLCG2, SH3KBP1, SOS1, SYK, VAV1]
R-HSA:114604	REACTOME_Pathways_27.02.2019	GPVI-mediated activation cascade	[-1]	[Group8]	6	17.142857	3.700900936975412E-5	0.004182018058782216	{Group8=3.964956840007208E-13}	{Group8=3.568461156006487E-12}	[LYN, PLCG2, PTPN6, SYK, VAV2, VAV3]	[CDC42, CLEC1B, COL1A1, COL1A2, FCER1G, FYN, GP6, LAT, LCK, LCP2, LYN, MPIG6B, PDPK1, PDPN, PIK3CA, PIK3CB, PIK3CG, PIK3R1, PIK3R2, PIK3R3, PIK3R5, PIK3R6, PLCG2, PRKCZ, PTPN11, PTPN6, RAC1, RAC2, RHOA, RHOB, RHOG, SYK, VAV1, VAV2, VAV3]
R-HSA:2029480	REACTOME_Pathways_27.02.2019	Fcgamma receptor (FCGR) dependent phagocytosis	[-1]	[Group8]	10	11.627907	3.773430870528202E-6	4.641319970749688E-4	{Group8=3.964956840007208E-13}	{Group8=3.568461156006487E-12}	[BTK, HCK, ITPR1, LYN, PLCG2, PLD4, PRKCE, SYK, VAV2, VAV3]	[ABI1, ABI2, ABL1, ACTB, ACTG1, ACTR2, ACTR3, AHCYL1, ARPC1A, ARPC1B, ARPC2, ARPC3, ARPC4, ARPC5, BAIAP2, BRK1, BTK, CD247, CD3G, CDC42, CFL1, CRK, CYFIP1, CYFIP2, DOCK1, ELMO1, ELMO2, FCGR1A, FCGR2A, FCGR3A, FGR, FYN, GRB2, HCK, HSP90AA1, HSP90AB1, ITPR1, ITPR2, ITPR3, LIMK1, LYN, MAPK1, MAPK3, MYH2, MYH9, MYO10, MYO1C, MYO5A, MYO9B, NCK1, NCKAP1, NCKAP1L, NCKIPSD, NF2, PAK1, PIK3CA, PIK3CB, PIK…
R-HSA:2424481	REACTOME_Reactions_27.02.2019	Recruitment of VAV and BTK to p-SLP-76	[-1]	[Group8]	4	36.363636	3.268295260929466E-5	0.003758539550068886	{Group8=3.964956840007208E-13}	{Group8=3.568461156006487E-12}	[BTK, PLCG2, VAV2, VAV3]	[BTK, GRAP2, GRB2, LAT, LCP2, PLCG1, PLCG2, SHC1, SOS1, VAV2, VAV3]
R-HSA:2424484	REACTOME_Reactions_27.02.2019	Phosphorylation of BTK by p-SYK	[-1]	[Group8]	5	22.727272	4.0373989947113136E-5	0.004521886874076671	{Group8=3.964956840007208E-13}	{Group8=3.568461156006487E-12}	[BTK, PLCG2, SYK, VAV2, VAV3]	[B2M, BTK, FYN, GRAP2, GRB2, HLA-E, KLRC2, KLRC4-KLRK1, KLRD1, KLRK1, LAT, LCK, LCP2, PLCG1, PLCG2, SHC1, SOS1, SYK, TREM2, TYROBP, VAV2, VAV3]
R-HSA:2424485	REACTOME_Reactions_27.02.2019	Release of p-PLCG1	[-1]	[Group8]	4	36.363636	3.268295260929466E-5	0.003758539550068886	{Group8=3.964956840007208E-13}	{Group8=3.568461156006487E-12}	[BTK, PLCG2, VAV2, VAV3]	[BTK, GRAP2, GRB2, LAT, LCP2, PLCG1, PLCG2, SHC1, SOS1, VAV2, VAV3]
R-HSA:2424486	REACTOME_Reactions_27.02.2019	Phosphorylation and activation of VAV2/VAV3 by SYK	[-1]	[Group8]	5	22.727272	4.0373989947113136E-5	0.004521886874076671	{Group8=3.964956840007208E-13}	{Group8=3.568461156006487E-12}	[BTK, PLCG2, SYK, VAV2, VAV3]	[B2M, BTK, FYN, GRAP2, GRB2, HLA-E, KLRC2, KLRC4-KLRK1, KLRD1, KLRK1, LAT, LCK, LCP2, PLCG1, PLCG2, SHC1, SOS1, SYK, TREM2, TYROBP, VAV2, VAV3]
R-HSA:2424487	REACTOME_Reactions_27.02.2019	Phosphorylation of PLC-gamma by p-BTK/p-SYK	[-1]	[Group8]	5	22.727272	4.0373989947113136E-5	0.004521886874076671	{Group8=3.964956840007208E-13}	{Group8=3.568461156006487E-12}	[BTK, PLCG2, SYK, VAV2, VAV3]	[B2M, BTK, FYN, GRAP2, GRB2, HLA-E, KLRC2, KLRC4-KLRK1, KLRD1, KLRK1, LAT, LCK, LCP2, PLCG1, PLCG2, SHC1, SOS1, SYK, TREM2, TYROBP, VAV2, VAV3]
R-HSA:2454202	REACTOME_Pathways_27.02.2019	Fc epsilon receptor (FCERI) signaling	[-1]	[Group8]	11	8.208955	3.599473062060743E-5	0.004103399290749247	{Group8=3.964956840007208E-13}	{Group8=3.568461156006487E-12}	[BTK, GAB2, ITPR1, LAT2, LYN, PLCG2, PPP3CA, SYK, UBA52, VAV2, VAV3]	[AHCYL1, BCL10, BTK, BTRC, CALM1, CALM2, CALM3, CARD11, CDC34, CHUK, CUL1, FBXW11, FCER1A, FCER1G, FOS, FYN, GAB2, GRAP2, GRB2, HRAS, IKBKB, IKBKG, ITK, ITPR1, ITPR2, ITPR3, JUN, KRAS, LAT, LAT2, LCP2, LYN, MALT1, MAP2K4, MAP2K7, MAP3K1, MAP3K7, MAPK1, MAPK10, MAPK3, MAPK8, MAPK9, MS4A2, NFATC1, NFATC2, NFATC3, NFKB1, NFKBIA, NRAS, PAK1, PAK2, PDPK1, PIK3CA, PIK3CB, PIK3R1, PIK3R2, PLCG1, PLCG2, …
R-HSA:2730833	REACTOME_Reactions_27.02.2019	Phosphorylation of TEC kinases by p-SYK	[-1]	[Group8]	6	30.0	1.1137920178800022E-6	1.4256537828864028E-4	{Group8=3.964956840007208E-13}	{Group8=3.568461156006487E-12}	[BTK, LYN, PLCG2, SYK, VAV2, VAV3]	[BTK, FCER1A, FCER1G, GRAP2, GRB2, ITK, LAT, LCP2, LYN, MS4A2, PLCG1, PLCG2, SHC1, SOS1, SYK, TEC, TXK, VAV1, VAV2, VAV3]
R-HSA:2730860	REACTOME_Reactions_27.02.2019	Phosphorylation of GAB2 by SYK/FYN	[-1]	[Group8]	4	36.363636	3.268295260929466E-5	0.003758539550068886	{Group8=3.964956840007208E-13}	{Group8=3.568461156006487E-12}	[GAB2, LAT2, LYN, SYK]	[FCER1A, FCER1G, FYN, GAB2, GRB2, LAT2, LYN, MS4A2, SHC1, SOS1, SYK]
R-HSA:2730888	REACTOME_Reactions_27.02.2019	Phosphorylation of PLC-gamma	[-1]	[Group8]	6	30.0	1.1137920178800022E-6	1.4256537828864028E-4	{Group8=3.964956840007208E-13}	{Group8=3.568461156006487E-12}	[BTK, LYN, PLCG2, SYK, VAV2, VAV3]	[BTK, FCER1A, FCER1G, GRAP2, GRB2, ITK, LAT, LCP2, LYN, MS4A2, PLCG1, PLCG2, SHC1, SOS1, SYK, TEC, TXK, VAV1, VAV2, VAV3]
R-HSA:2871809	REACTOME_Pathways_27.02.2019	FCERI mediated Ca+2 mobilization	[-1]	[Group8]	8	24.242424	1.0698402487972181E-7	1.4121891284123278E-5	{Group8=3.964956840007208E-13}	{Group8=3.568461156006487E-12}	[BTK, ITPR1, LYN, PLCG2, PPP3CA, SYK, VAV2, VAV3]	[AHCYL1, BTK, CALM1, CALM2, CALM3, FCER1A, FCER1G, GRAP2, GRB2, ITK, ITPR1, ITPR2, ITPR3, LAT, LCP2, LYN, MS4A2, NFATC1, NFATC2, NFATC3, PLCG1, PLCG2, PPP3CA, PPP3CB, PPP3R1, SHC1, SOS1, SYK, TEC, TXK, VAV1, VAV2, VAV3]
R-HSA:437932	REACTOME_Reactions_27.02.2019	p-Y348-SYK binds VAV family	[-1]	[Group8]	3	75.0	2.387570391502044E-5	0.0027934573580573915	{Group8=3.964956840007208E-13}	{Group8=3.568461156006487E-12}	[SYK, VAV2, VAV3]	[SYK, VAV1, VAV2, VAV3]
R-HSA:437936	REACTOME_Reactions_27.02.2019	p-Y348-SYK phosphorylates VAV family	[-1]	[Group8]	3	75.0	2.387570391502044E-5	0.0027934573580573915	{Group8=3.964956840007208E-13}	{Group8=3.568461156006487E-12}	[SYK, VAV2, VAV3]	[SYK, VAV1, VAV2, VAV3]
R-HSA:512988	REACTOME_Pathways_27.02.2019	Interleukin-3, Interleukin-5 and GM-CSF signaling	[-1]	[Group8]	7	14.583333	2.4774267915491855E-5	0.0028738150781970552	{Group8=3.964956840007208E-13}	{Group8=3.568461156006487E-12}	[BLNK, GAB2, HCK, LYN, PTPN6, SYK, UBA52]	[BLNK, CBL, CRK, CRKL, CSF2, CSF2RA, CSF2RB, FYN, GAB2, GRB2, HCK, IL2, IL2RA, IL2RB, IL2RG, IL3, IL3RA, IL5, IL5RA, INPP5D, INPPL1, JAK1, JAK2, JAK3, LYN, PIK3CA, PIK3CB, PIK3CD, PIK3R1, PIK3R2, PIK3R3, PRKACA, PTPN11, PTPN6, RAPGEF1, RPS27A, SHC1, SOS1, STAT5A, STAT5B, SYK, TEC, UBA52, UBB, UBC, VAV1, YES1, YWHAZ]
R-HSA:5690701	REACTOME_Reactions_27.02.2019	SHP1 binds p-CD22	[-1]	[Group8]	4	100.0	1.0964659226722244E-7	1.4363703587006139E-5	{Group8=3.964956840007208E-13}	{Group8=3.568461156006487E-12}	[CD22, CD79A, CD79B, PTPN6]	[CD22, CD79A, CD79B, PTPN6]
R-HSA:5690702	REACTOME_Reactions_27.02.2019	LYN phosphorylates CD22	[-1]	[Group8]	4	100.0	1.0964659226722244E-7	1.4363703587006139E-5	{Group8=3.964956840007208E-13}	{Group8=3.568461156006487E-12}	[CD22, CD79A, CD79B, LYN]	[CD22, CD79A, CD79B, LYN]
R-HSA:5690714	REACTOME_Pathways_27.02.2019	CD22 mediated BCR regulation	[-1]	[Group8]	5	100.0	1.9811498026696417E-9	2.7736097237374987E-7	{Group8=3.964956840007208E-13}	{Group8=3.568461156006487E-12}	[CD22, CD79A, CD79B, LYN, PTPN6]	[CD22, CD79A, CD79B, LYN, PTPN6]
R-HSA:5690740	REACTOME_Reactions_27.02.2019	CD22 binds B-cell receptor	[-1]	[Group8]	3	100.0	6.051160922777961E-6	7.321904716561333E-4	{Group8=3.964956840007208E-13}	{Group8=3.568461156006487E-12}	[CD22, CD79A, CD79B]	[CD22, CD79A, CD79B]
R-HSA:912631	REACTOME_Pathways_27.02.2019	Regulation of signaling by CBL	[-1]	[Group8]	5	22.727272	4.0373989947113136E-5	0.004521886874076671	{Group8=3.964956840007208E-13}	{Group8=3.568461156006487E-12}	[BLNK, HCK, LYN, SYK, UBA52]	[BLNK, CBL, CRK, CRKL, FYN, GRB2, HCK, LYN, PIK3CA, PIK3CB, PIK3CD, PIK3R1, PIK3R2, PIK3R3, RAPGEF1, RPS27A, SYK, UBA52, UBB, UBC, VAV1, YES1]
R-HSA:9606151	REACTOME_Reactions_27.02.2019	Phosphorylated BLNK (SLP65, in Antigen:p-BCR:p-SYK:p-BLNK:CIN85:GRB2:SOS1) binds BTK, PLCG2, VAV1, NCK1	[-1]	[Group8]	6	54.545456	1.5260324006034008E-8	2.075404064820625E-6	{Group8=3.964956840007208E-13}	{Group8=3.568461156006487E-12}	[BLNK, BTK, CD79A, CD79B, PLCG2, SYK]	[BLNK, BTK, CD79A, CD79B, GRB2, NCK1, PLCG2, SH3KBP1, SOS1, SYK, VAV1]
R-HSA:9606159	REACTOME_Reactions_27.02.2019	BTK autophosphorylates	[-1]	[Group8]	6	54.545456	1.5260324006034008E-8	2.075404064820625E-6	{Group8=3.964956840007208E-13}	{Group8=3.568461156006487E-12}	[BLNK, BTK, CD79A, CD79B, PLCG2, SYK]	[BLNK, BTK, CD79A, CD79B, GRB2, NCK1, PLCG2, SH3KBP1, SOS1, SYK, VAV1]
R-HSA:9606162	REACTOME_Reactions_27.02.2019	Phosphorylated BTK phosphorylates PLCG2	[-1]	[Group8]	6	54.545456	1.5260324006034008E-8	2.075404064820625E-6	{Group8=3.964956840007208E-13}	{Group8=3.568461156006487E-12}	[BLNK, BTK, CD79A, CD79B, PLCG2, SYK]	[BLNK, BTK, CD79A, CD79B, GRB2, NCK1, PLCG2, SH3KBP1, SOS1, SYK, VAV1]
R-HSA:9606163	REACTOME_Reactions_27.02.2019	p-SYK and LYN phosphorylate BTK	[-1]	[Group8]	7	58.333332	4.693280637799588E-10	6.61752569929742E-8	{Group8=3.964956840007208E-13}	{Group8=3.568461156006487E-12}	[BLNK, BTK, CD79A, CD79B, LYN, PLCG2, SYK]	[BLNK, BTK, CD79A, CD79B, GRB2, LYN, NCK1, PLCG2, SH3KBP1, SOS1, SYK, VAV1]
R-HSA:983695	REACTOME_Pathways_27.02.2019	Antigen activates B Cell Receptor (BCR) leading to generation of second messengers	[-1]	[Group8]	12	37.5	1.8687428710308002E-13	2.6536148768637363E-11	{Group8=3.964956840007208E-13}	{Group8=3.568461156006487E-12}	[BLNK, BTK, CD19, CD22, CD79A, CD79B, ITPR1, LYN, PIK3AP1, PLCG2, PTPN6, SYK]	[AHCYL1, BLK, BLNK, BTK, CALM1, CALM2, CALM3, CD19, CD22, CD79A, CD79B, DAPP1, FYN, GRB2, ITPR1, ITPR2, ITPR3, LYN, NCK1, ORAI1, ORAI2, PIK3AP1, PIK3CD, PIK3R1, PLCG2, PTPN6, SH3KBP1, SOS1, STIM1, SYK, TRPC1, VAV1]
R-HSA:983700	REACTOME_Reactions_27.02.2019	SYK binds the activated BCR	[-1]	[Group8]	3	100.0	6.051160922777961E-6	7.321904716561333E-4	{Group8=3.964956840007208E-13}	{Group8=3.568461156006487E-12}	[CD79A, CD79B, SYK]	[CD79A, CD79B, SYK]
R-HSA:983703	REACTOME_Reactions_27.02.2019	p-6Y-SYK phosphorylates BLNK (SLP65)	[-1]	[Group8]	4	57.142857	3.673699936974251E-6	4.555387921848071E-4	{Group8=3.964956840007208E-13}	{Group8=3.568461156006487E-12}	[BLNK, CD79A, CD79B, SYK]	[BLNK, CD79A, CD79B, GRB2, SH3KBP1, SOS1, SYK]
R-HSA:983705	REACTOME_Pathways_27.02.2019	Signaling by the B Cell Receptor (BCR)	[-1]	[Group8]	15	13.392858	1.9814164975213095E-9	2.75416893155462E-7	{Group8=3.964956840007208E-13}	{Group8=3.568461156006487E-12}	[BLNK, BTK, CD19, CD22, CD79A, CD79B, ITPR1, LYN, PIK3AP1, PLCG2, PPP3CA, PTPN6, RASGRP3, SYK, UBA52]	[AHCYL1, BCL10, BLK, BLNK, BTK, BTRC, CALM1, CALM2, CALM3, CARD11, CD19, CD22, CD79A, CD79B, CHUK, CUL1, DAPP1, FBXW11, FKBP1A, FYN, GRB2, HRAS, IKBKB, IKBKG, ITPR1, ITPR2, ITPR3, KRAS, LYN, MALT1, MAP3K7, NCK1, NFATC1, NFATC2, NFATC3, NFKB1, NFKBIA, NFKBIB, NFKBIE, NRAS, ORAI1, ORAI2, PIK3AP1, PIK3CD, PIK3R1, PLCG2, PPIA, PPP3CA, PPP3CB, PPP3R1, PRKCB, PSMA1, PSMA2, PSMA3, PSMA4, PSMA5, PSMA6, P…
R-HSA:983707	REACTOME_Reactions_27.02.2019	SYK autophosphorylates at the activated BCR	[-1]	[Group8]	5	100.0	1.9811498026696417E-9	2.7736097237374987E-7	{Group8=3.964956840007208E-13}	{Group8=3.568461156006487E-12}	[CD22, CD79A, CD79B, PTPN6, SYK]	[CD22, CD79A, CD79B, PTPN6, SYK]
R-HSA:983709	REACTOME_Reactions_27.02.2019	LYN, FYN, BLK phosphorylate ITAMs of Ig-alpha (CD79A) and Ig-beta (CD79B)	[-1]	[Group8]	5	71.42857	4.0364456666322E-8	5.368472736620826E-6	{Group8=3.964956840007208E-13}	{Group8=3.568461156006487E-12}	[CD22, CD79A, CD79B, LYN, PTPN6]	[BLK, CD22, CD79A, CD79B, FYN, LYN, PTPN6]
WP:23	WikiPathways_27.02.2019	B Cell Receptor Signaling Pathway	[-1]	[Group8]	18	18.367348	1.8214518928970361E-13	2.6046762068427616E-11	{Group8=3.964956840007208E-13}	{Group8=3.568461156006487E-12}	[BLNK, BTK, CD19, CD22, CD79A, CD79B, GAB1, GAB2, LAT2, LYN, MEF2C, PIK3AP1, PIP5K1B, PLCG2, PTPN6, RASGRP3, SYK, VAV2]	[AKT1, ATF2, BCL10, BCL6, BLK, BLNK, BRAF, BTK, CAMK2A, CARD11, CBL, CD19, CD22, CD79A, CD79B, CD81, CDC42, CHUK, CR2, CREB1, CRK, CRKL, DAPP1, E2F3, ELK1, ETS1, FOXO1, FYN, GAB1, GAB2, GRB2, GSK3A, GSK3B, GTF2I, HCLS1, HRAS, IKBKB, IKBKG, ILF2, INPP5D, IRF4, JUN, KLF11, LAT2, LCK, LYN, MALT1, MAP2K1, MAP2K2, MAP2K6, MAP3K7, MAP4K1, MAPK1, MAPK14, MAPK4, MAPK8, MAPK9, MAX, MEF2C, MEF2D, MIR5196, …
WP:2806	WikiPathways_27.02.2019	Human Complement System	[-1]	[Group2]	11	11.111111	1.9474633535272707E-6	2.4732784589796337E-4	{Group2=1.9474633535272707E-6}	{Group2=1.1684780121163624E-5}	[C3, CD19, CD40, CD55, CD93, CFH, FCER2, ITGAX, LRP2, SELL, THBS1]	[ADIPOQ, ADM, ALB, APCS, APOA1, ARRB2, C1QBP, C1R, C1S, C2, C3, C3AR1, C4A, C4BPA, C5, C5AR1, C5AR2, C6, C7, C8A, C9, CALR, CD19, CD40, CD46, CD55, CD59, CD93, CFB, CFD, CFH, CFHR2, CFHR4, CFI, CFP, CLEC4M, CPN1, CR1, CR2, CRP, CSNK1A1, DCN, ELANE, F10, F11, F12, F13A1, FCER2, FCGR3A, FCN1, FCN2, FGA, FGB, FGG, FKBP2, FPR1, GNA15, GNAI2, GNAI3, IBSP, ICAM1, ICAM2, ITGA2, ITGA2B, ITGAX, ITGB2, ITG…
WP:3937	WikiPathways_27.02.2019	Microglia Pathogen Phagocytosis Pathway	[-1]	[Group8]	9	22.5	3.4031786234929857E-8	4.560259355480601E-6	{Group8=3.964956840007208E-13}	{Group8=3.568461156006487E-12}	[C1QB, HCK, LYN, NCF1, PLCG2, PTPN6, SYK, VAV2, VAV3]	[ARPC1B, C1QA, C1QB, C1QC, CYBA, CYBB, FCER1G, FCGR1A, HCK, ITGAM, ITGB2, LAT, LYN, NCF1, NCF2, NCF4, NCKAP1L, PIK3C2A, PIK3C3, PIK3CA, PIK3CB, PIK3CD, PIK3CG, PIK3R1, PIK3R2, PIK3R3, PIK3R6, PLCG2, PTPN6, RAC1, RAC2, RAC3, SIGLEC7, SYK, TREM1, TREM2, TYROBP, VAV1, VAV2, VAV3]
WP:3945	WikiPathways_27.02.2019	TYROBP Causal Network	[-1]	[Group3]	9	14.285714	2.0352901006839104E-6	2.564465526861727E-4	{Group3=2.0352901006839104E-6}	{Group3=1.0176450503419551E-5}	[C3, CD37, CREB3L2, GAPT, ITGAX, KCNE3, PLEK, RBM47, RNASE6]	[ABCC4, ADAP2, APBB1IP, BIN2, C1QC, C3, CAPG, CD37, CD4, CD84, CREB3L2, CXCL16, CYTL1, DPYD, ELF4, FKBP15, GAL3ST4, GAPT, GIMAP2, GPX1, HCLS1, HLX, IGSF6, IL10RA, IL13RA1, IL18, ITGAM, ITGAX, ITGB2, KCNE3, LGALS9B, LGALS9C, LHFPL2, LOXL3, LYL1, MAF, MIR4709, MIR7846, NCF2, NCKAP1L, NPC2, NRROS, PLEK, PPP1R18, PYCARD, RBM47, RGS1, RNASE6, RPS6KA1, RUNX3, SAMSN1, SFT2D2, SH2B3, SLC1A5, SLC7A7, SPP1…
WP:4146	WikiPathways_27.02.2019	Macrophage markers	[-1]	[Group4]	4	44.444443	1.2846496413724638E-5	0.001528733073233232	{Group4=1.2846496413724638E-5}	{Group4=3.853948924117391E-5}	[CD74, CD83, CD86, LYZ]	[CD14, CD163, CD68, CD74, CD83, CD86, F3, LYZ, RAC2]
